# Supplementary material
Source: PubMed Central journal article supplement (PMC10529074)

## Extended Data Figure 1d

HDAC1

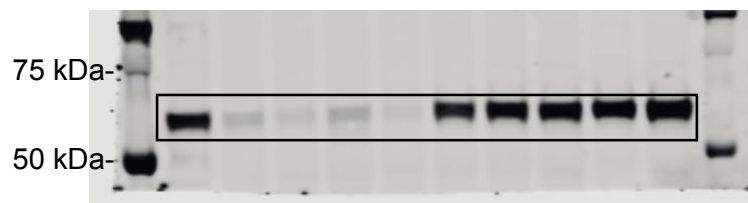

HDAC2

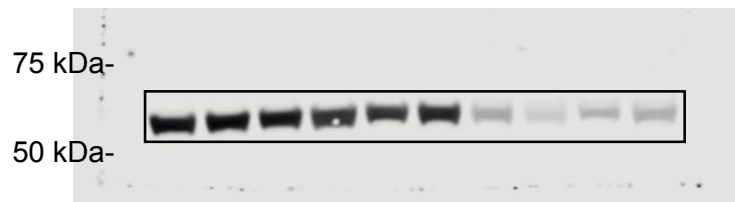

GAPDH

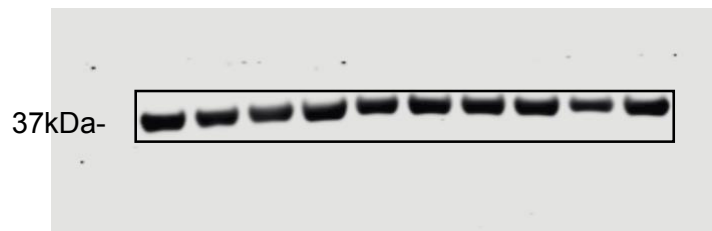

Supplement: NIHMS1923562-supplement-Gel_Images_Extended_Data_Fig__1.pdf [file NIHMS1923562-supplement-Gel_Images_Extended_Data_Fig__1.pdf]

**Extended Data Figure 2b**

HDAC1

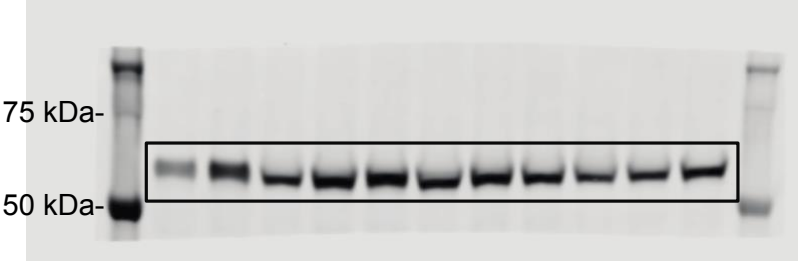

HDAC2

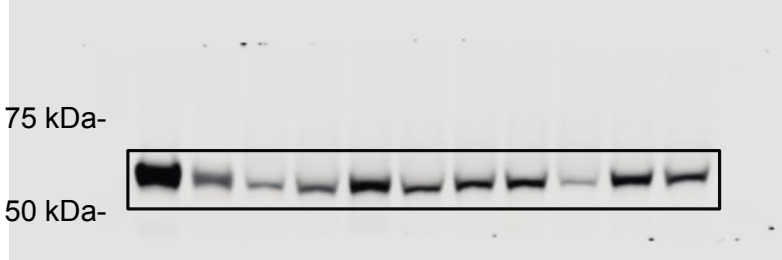

GAPDH

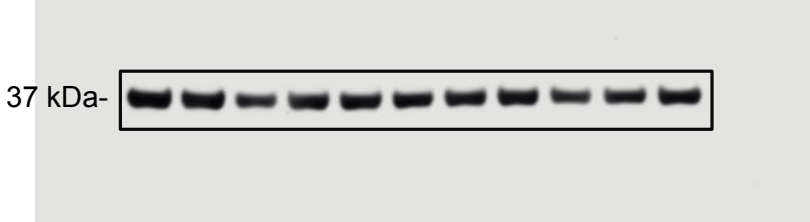

## Extended Data Figure 2e

HDAC1

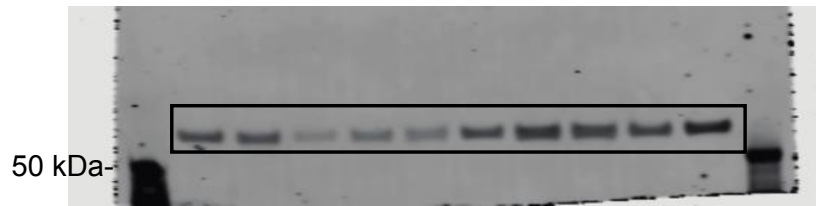

HDAC2

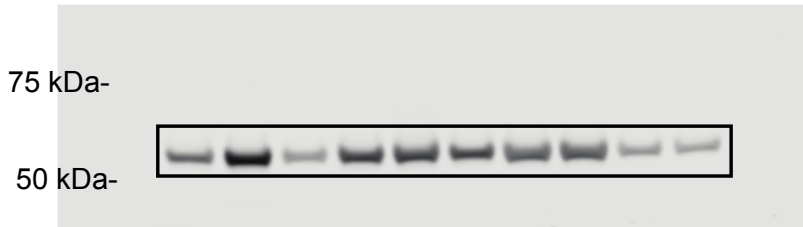

GAPDH

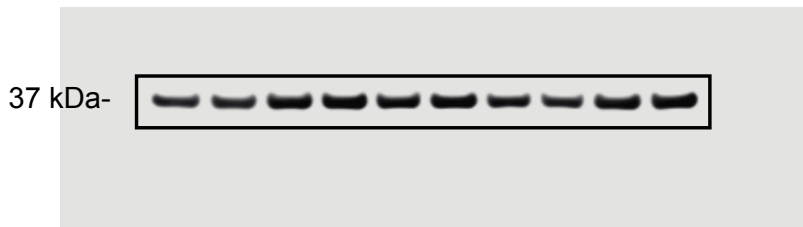

HDAC3

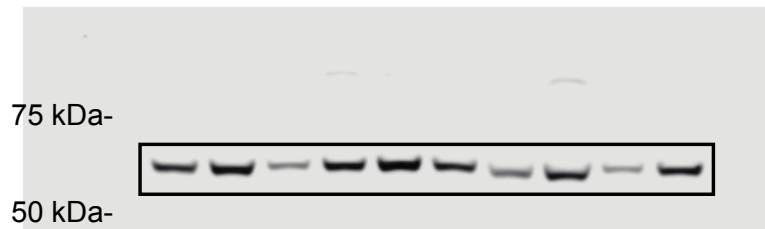

GAPDH

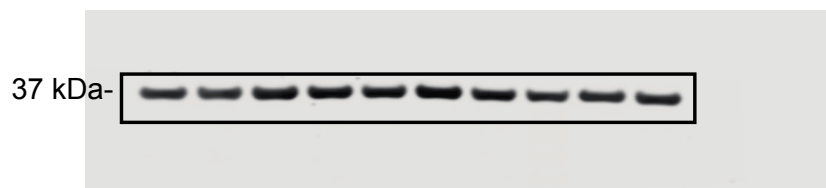

Supplement: NIHMS1923562-supplement-Gel_Images_Extended_Data_Fig__2.pdf [file NIHMS1923562-supplement-Gel_Images_Extended_Data_Fig__2.pdf]

**Extended Data Figure 5c**

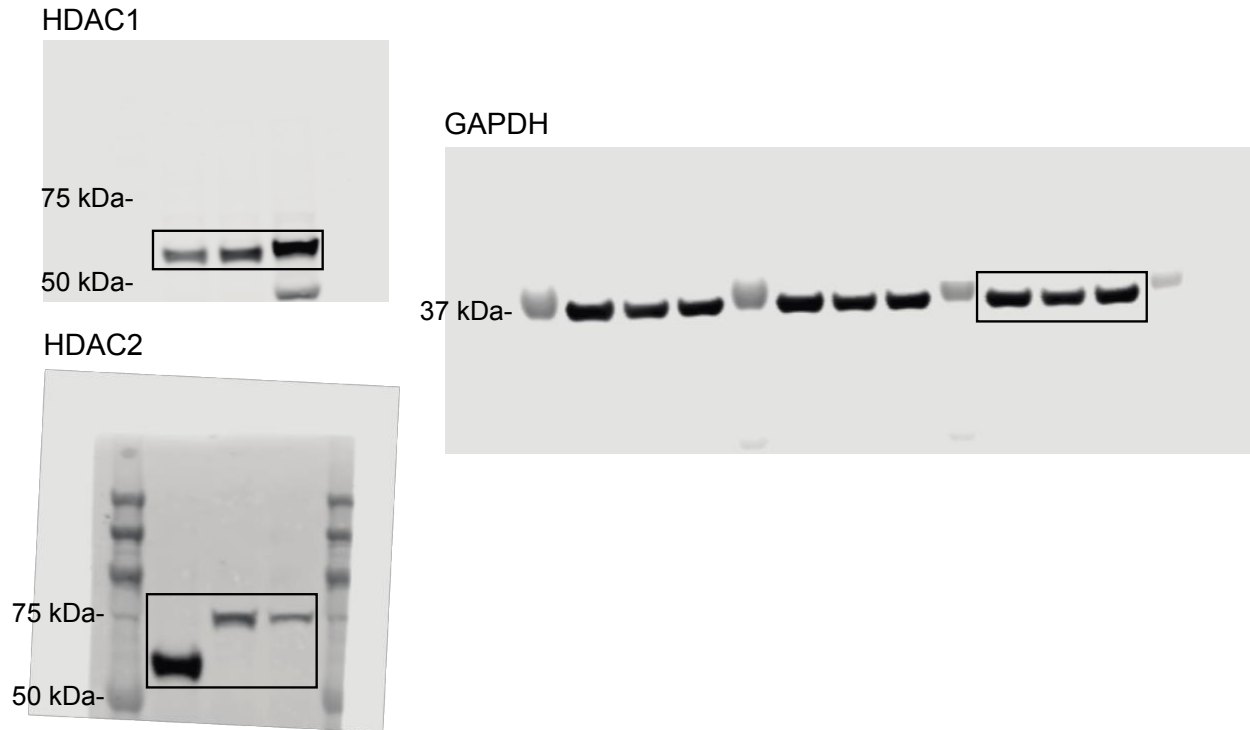

**Extended Data Figure 5d**

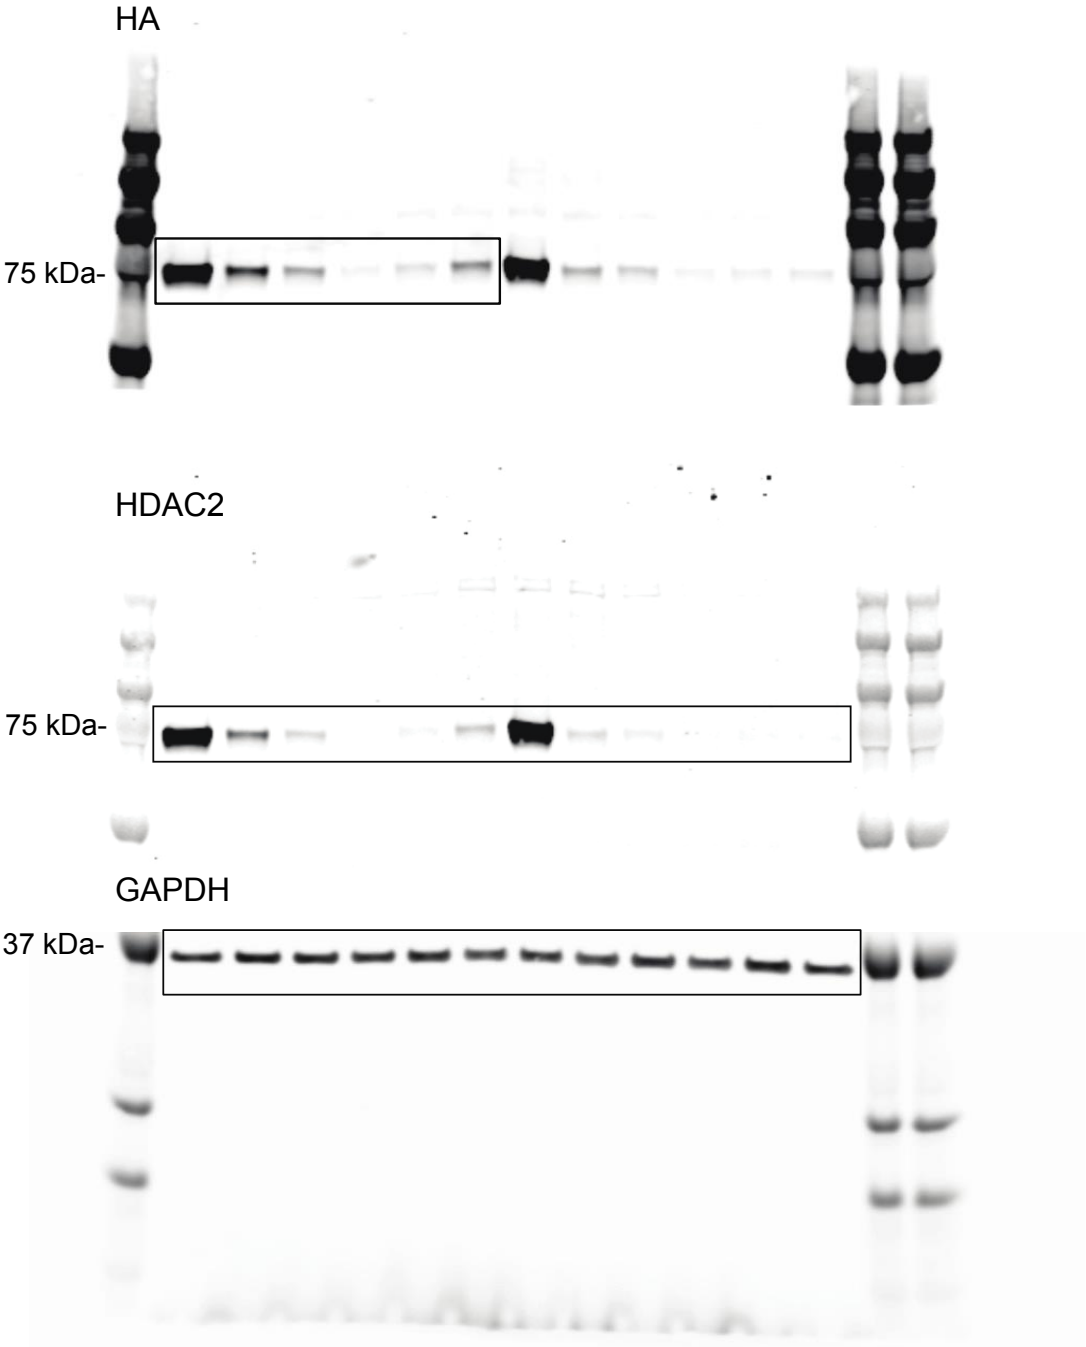

## Extended Data Figure 5h

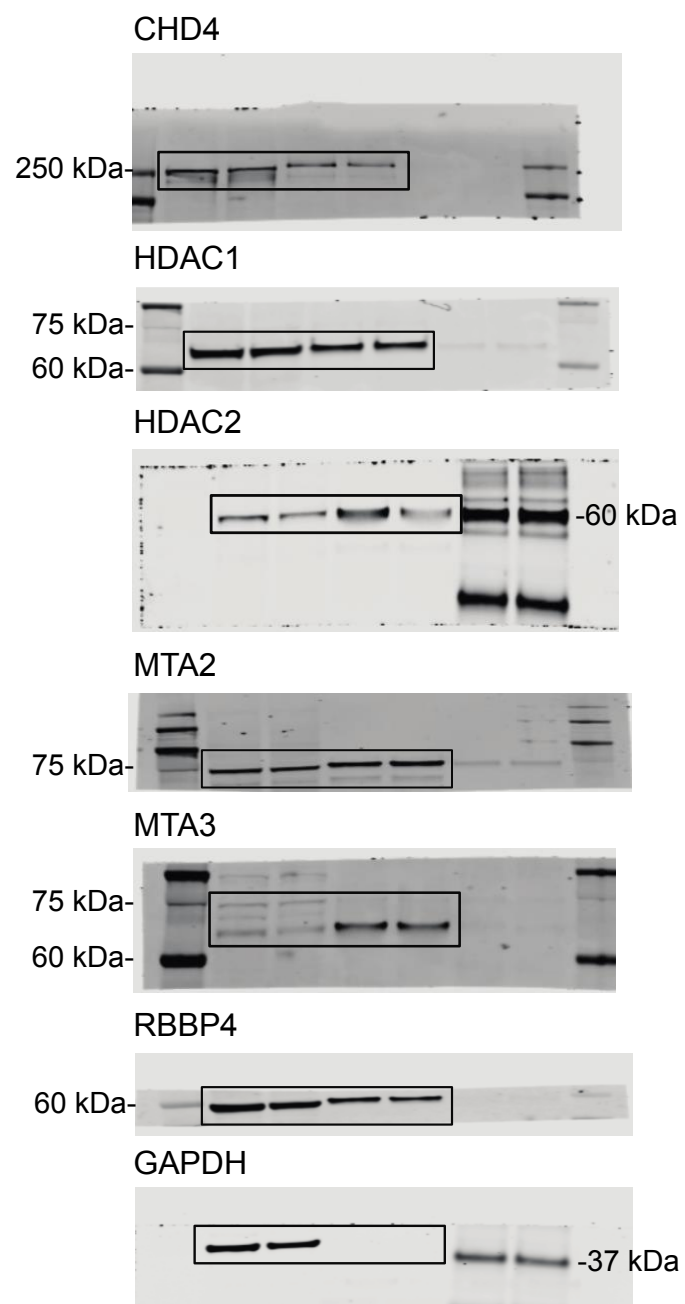

Supplement: NIHMS1923562-supplement-Gel_Images_Extended_Data_Fig__5.pdf [file NIHMS1923562-supplement-Gel_Images_Extended_Data_Fig__5.pdf]

# Extended Data Figure 8d

HDAC1

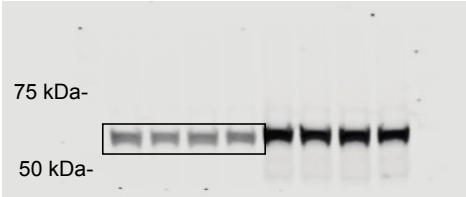

MTA3

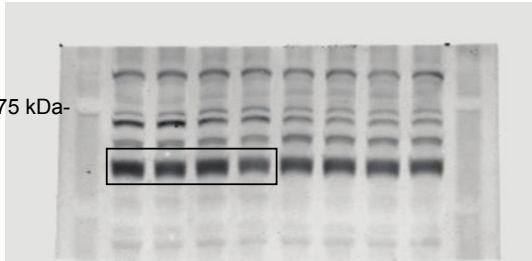

HDAC2

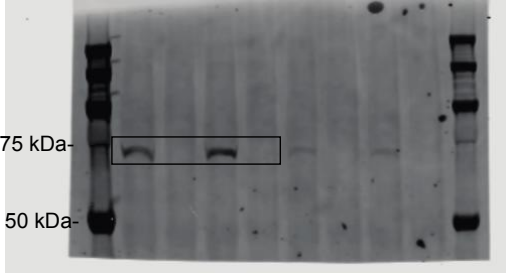

GAPDH

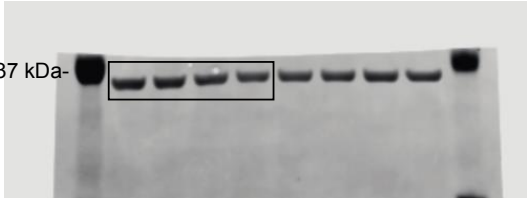

MBD3

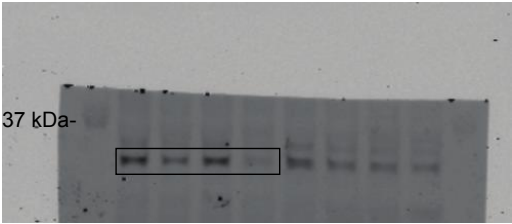

GAPDH

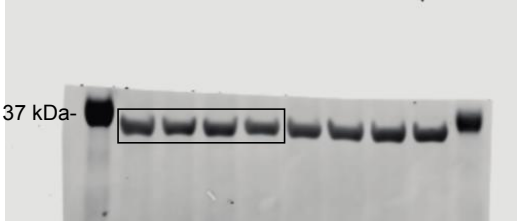

## Extended Data Figure 8e

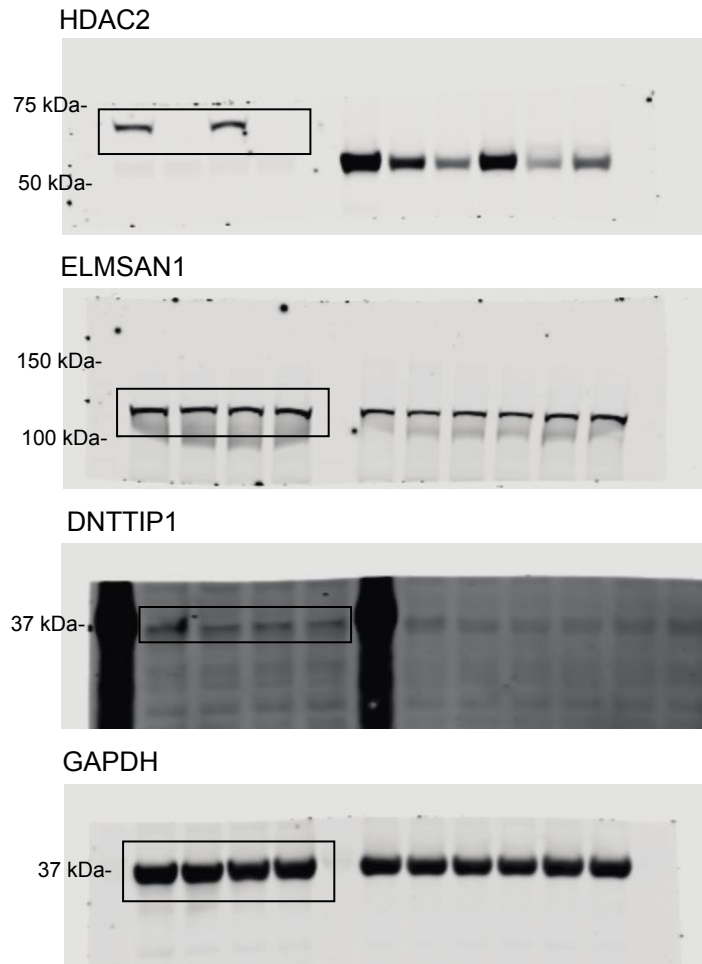

Supplement: NIHMS1923562-supplement-Gel_Images_Extended_Data_Fig__8.pdf [file NIHMS1923562-supplement-Gel_Images_Extended_Data_Fig__8.pdf]

**Extended Data Figure 9f**

CHD4

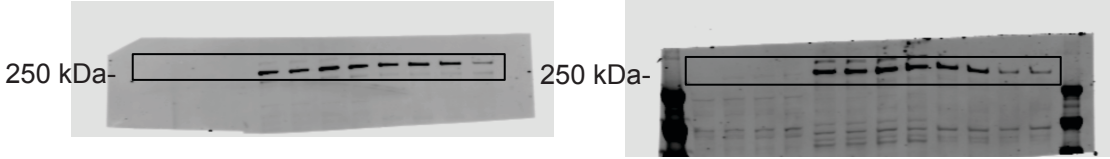

MTA3

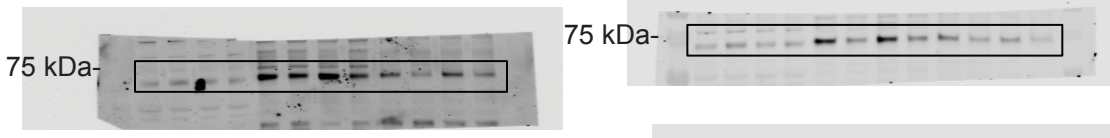

GAPDH

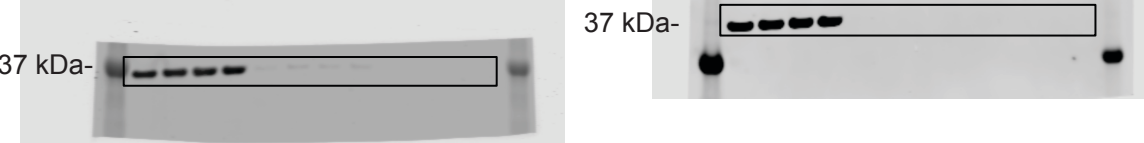

snRNP70

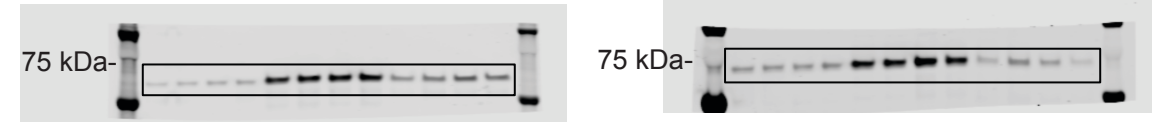

H3

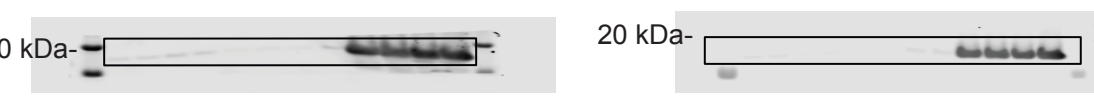

Supplement: NIHMS1923562-supplement-Gel_Images_Extended_Data_Fig__9.pdf [file NIHMS1923562-supplement-Gel_Images_Extended_Data_Fig__9.pdf]

**Figure 4e**

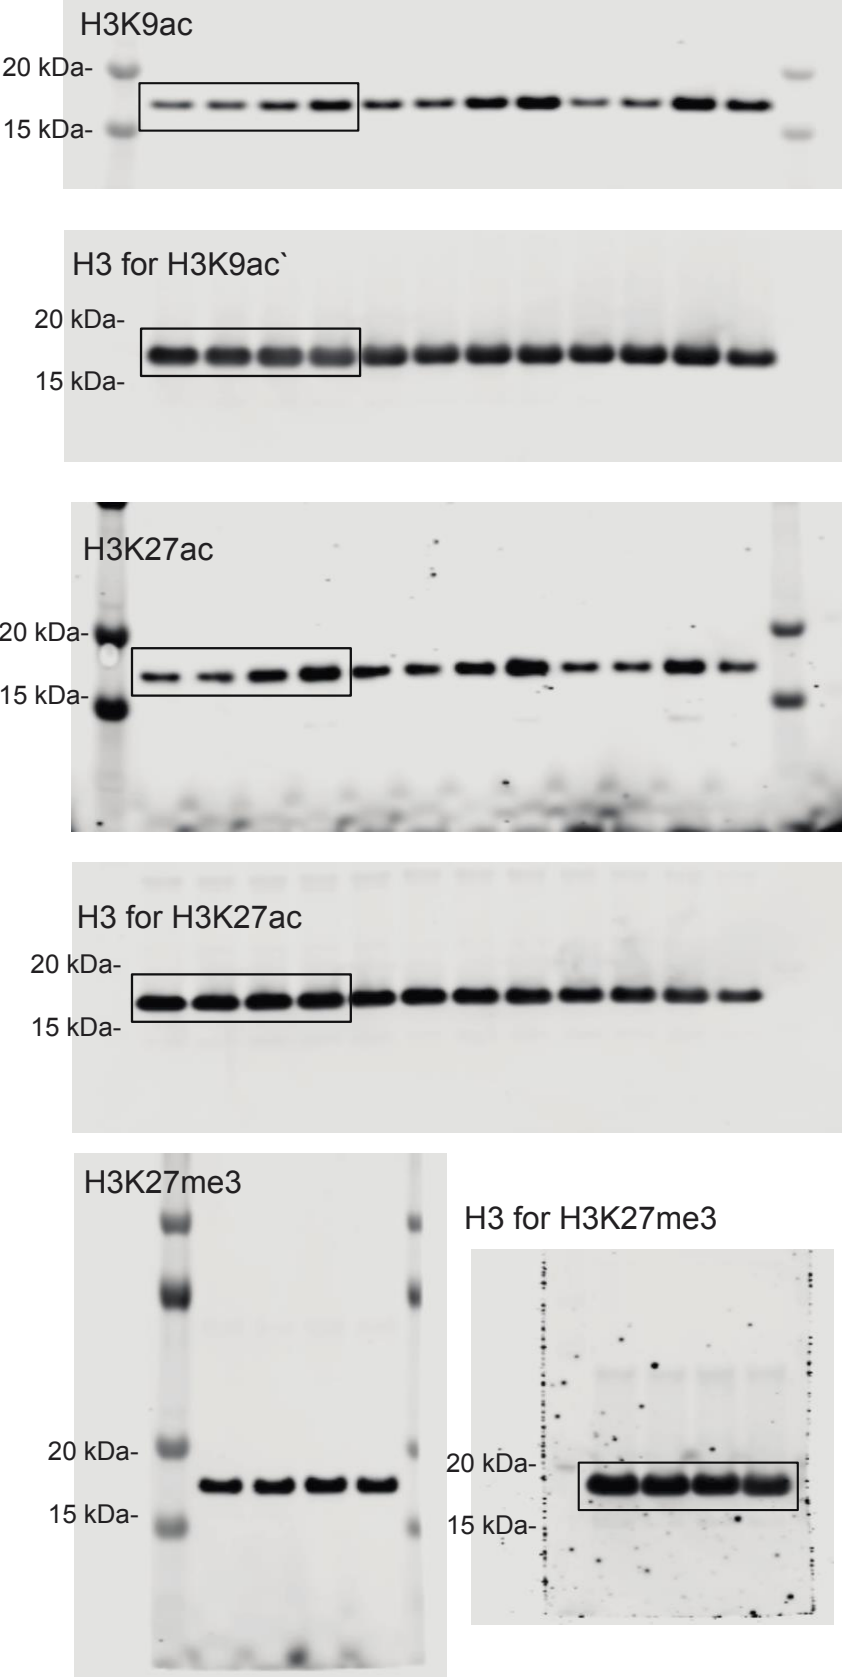

Supplement: NIHMS1923562-supplement-Gel_Images_Fig__4.pdf [file NIHMS1923562-supplement-Gel_Images_Fig__4.pdf]

**Figure 5e**

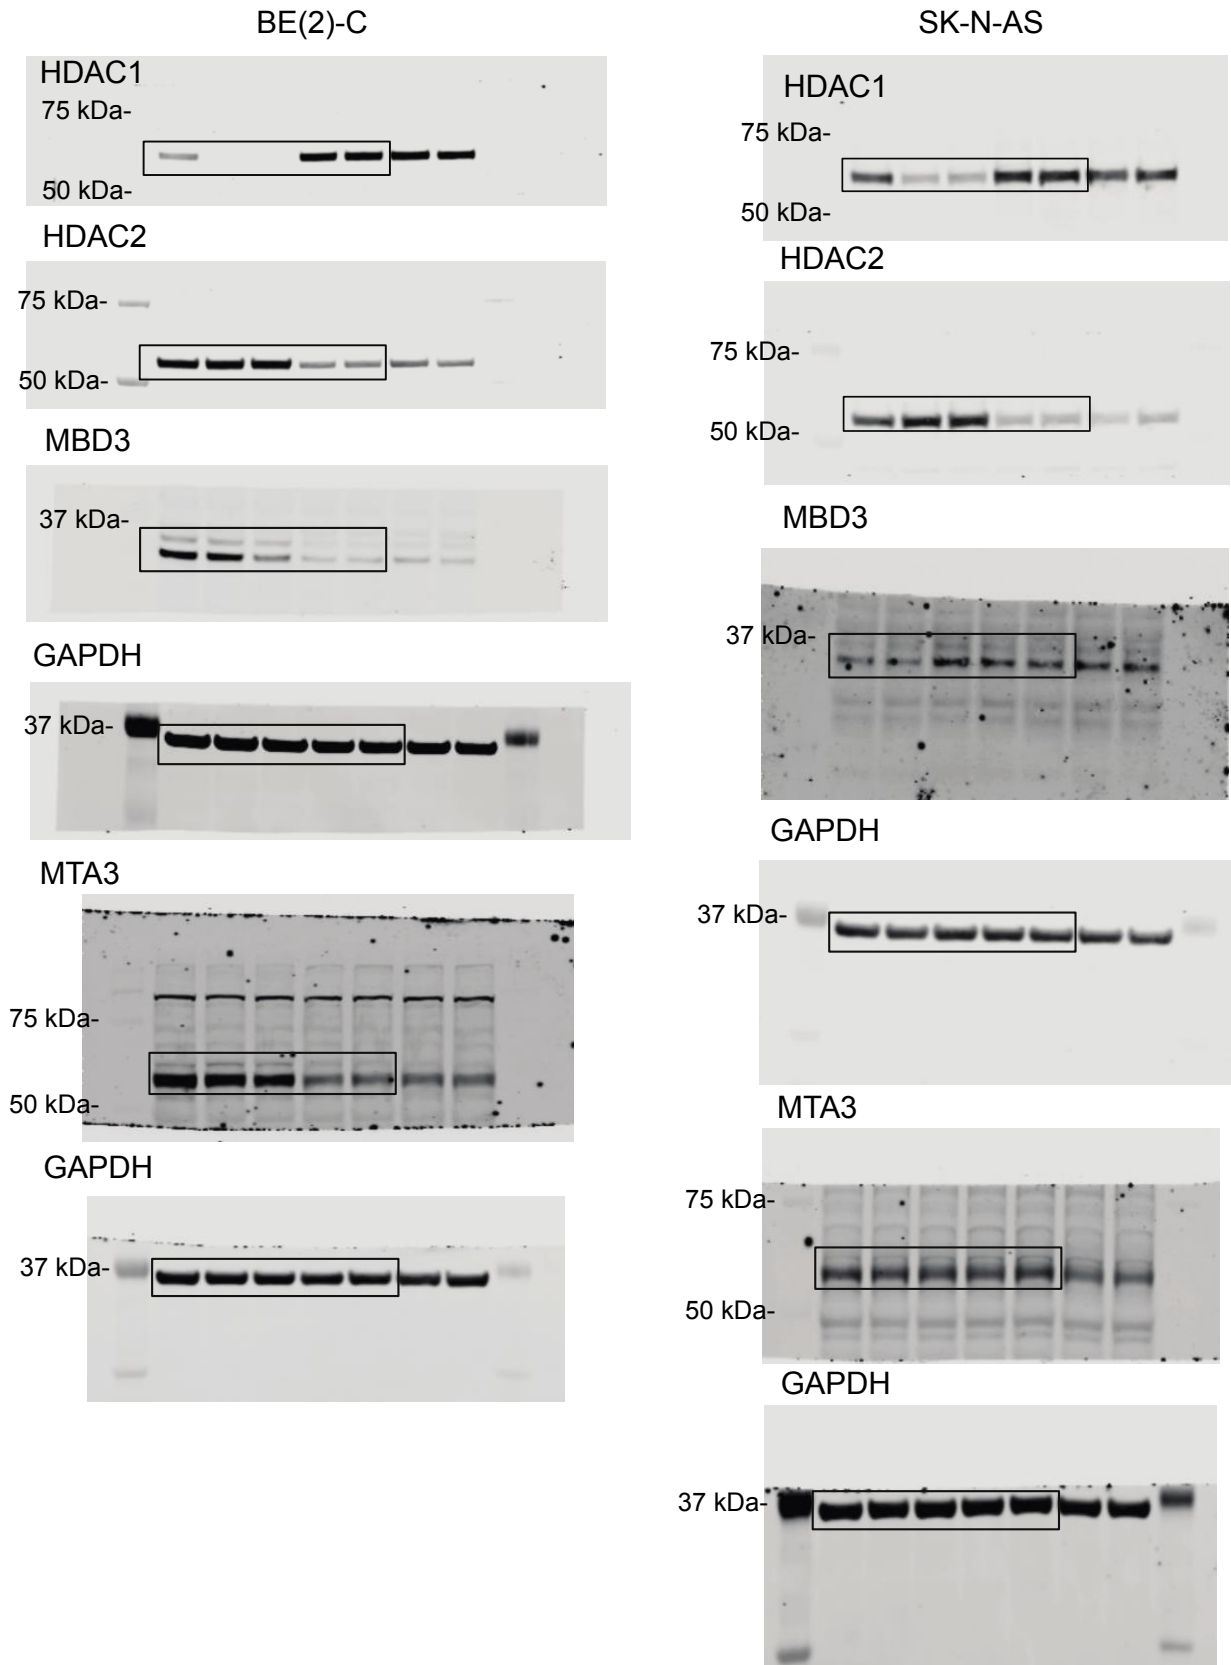

**Figure 5f**

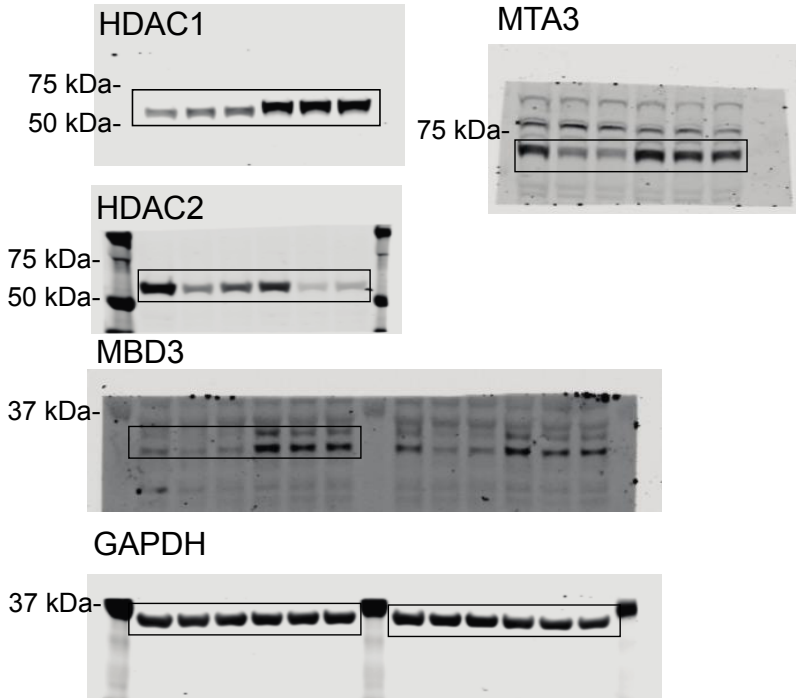

**Figure 5g**

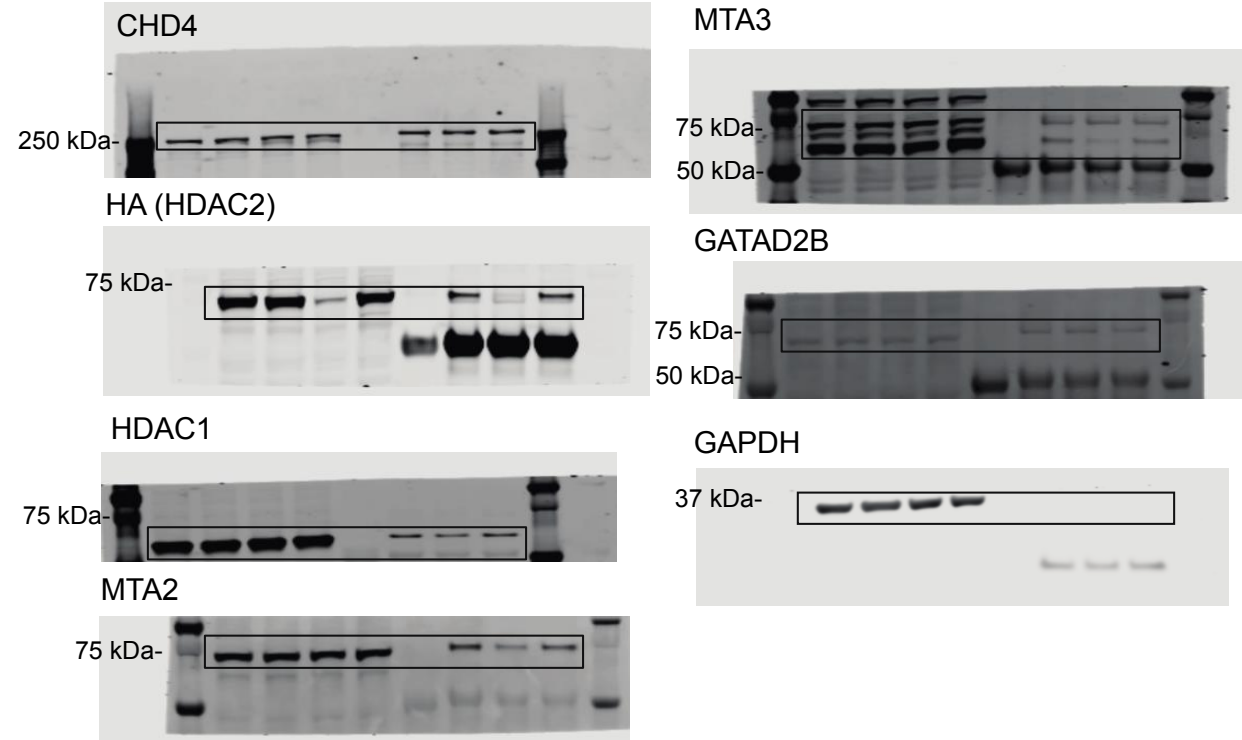

**Figure 5h**  
CHD4

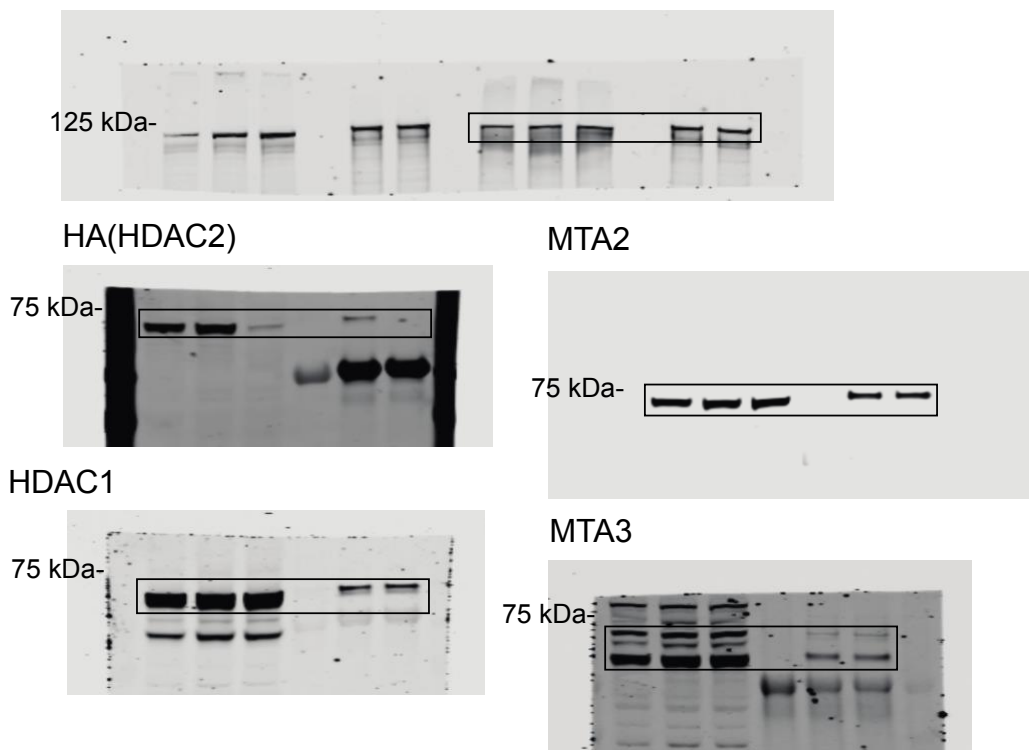

Supplement: NIHMS1923562-supplement-Gel_Images_Fig__5.pdf [file NIHMS1923562-supplement-Gel_Images_Fig__5.pdf]
